# Supplementary material for: RNAseq and quantitative proteomic analysis of Dictyostelium knock-out cells lacking the core autophagy proteins ATG9 and/or ATG16
Source: PubMed Central journal article supplement (PMC8204557; doi:10.1186/s12864-021-07756-2), 2021-06-15
Supplement: 12864_2021_7756_MOESM1_ESM.pdf [file 12864_2021_7756_MOESM1_ESM.pdf]

Figure S1

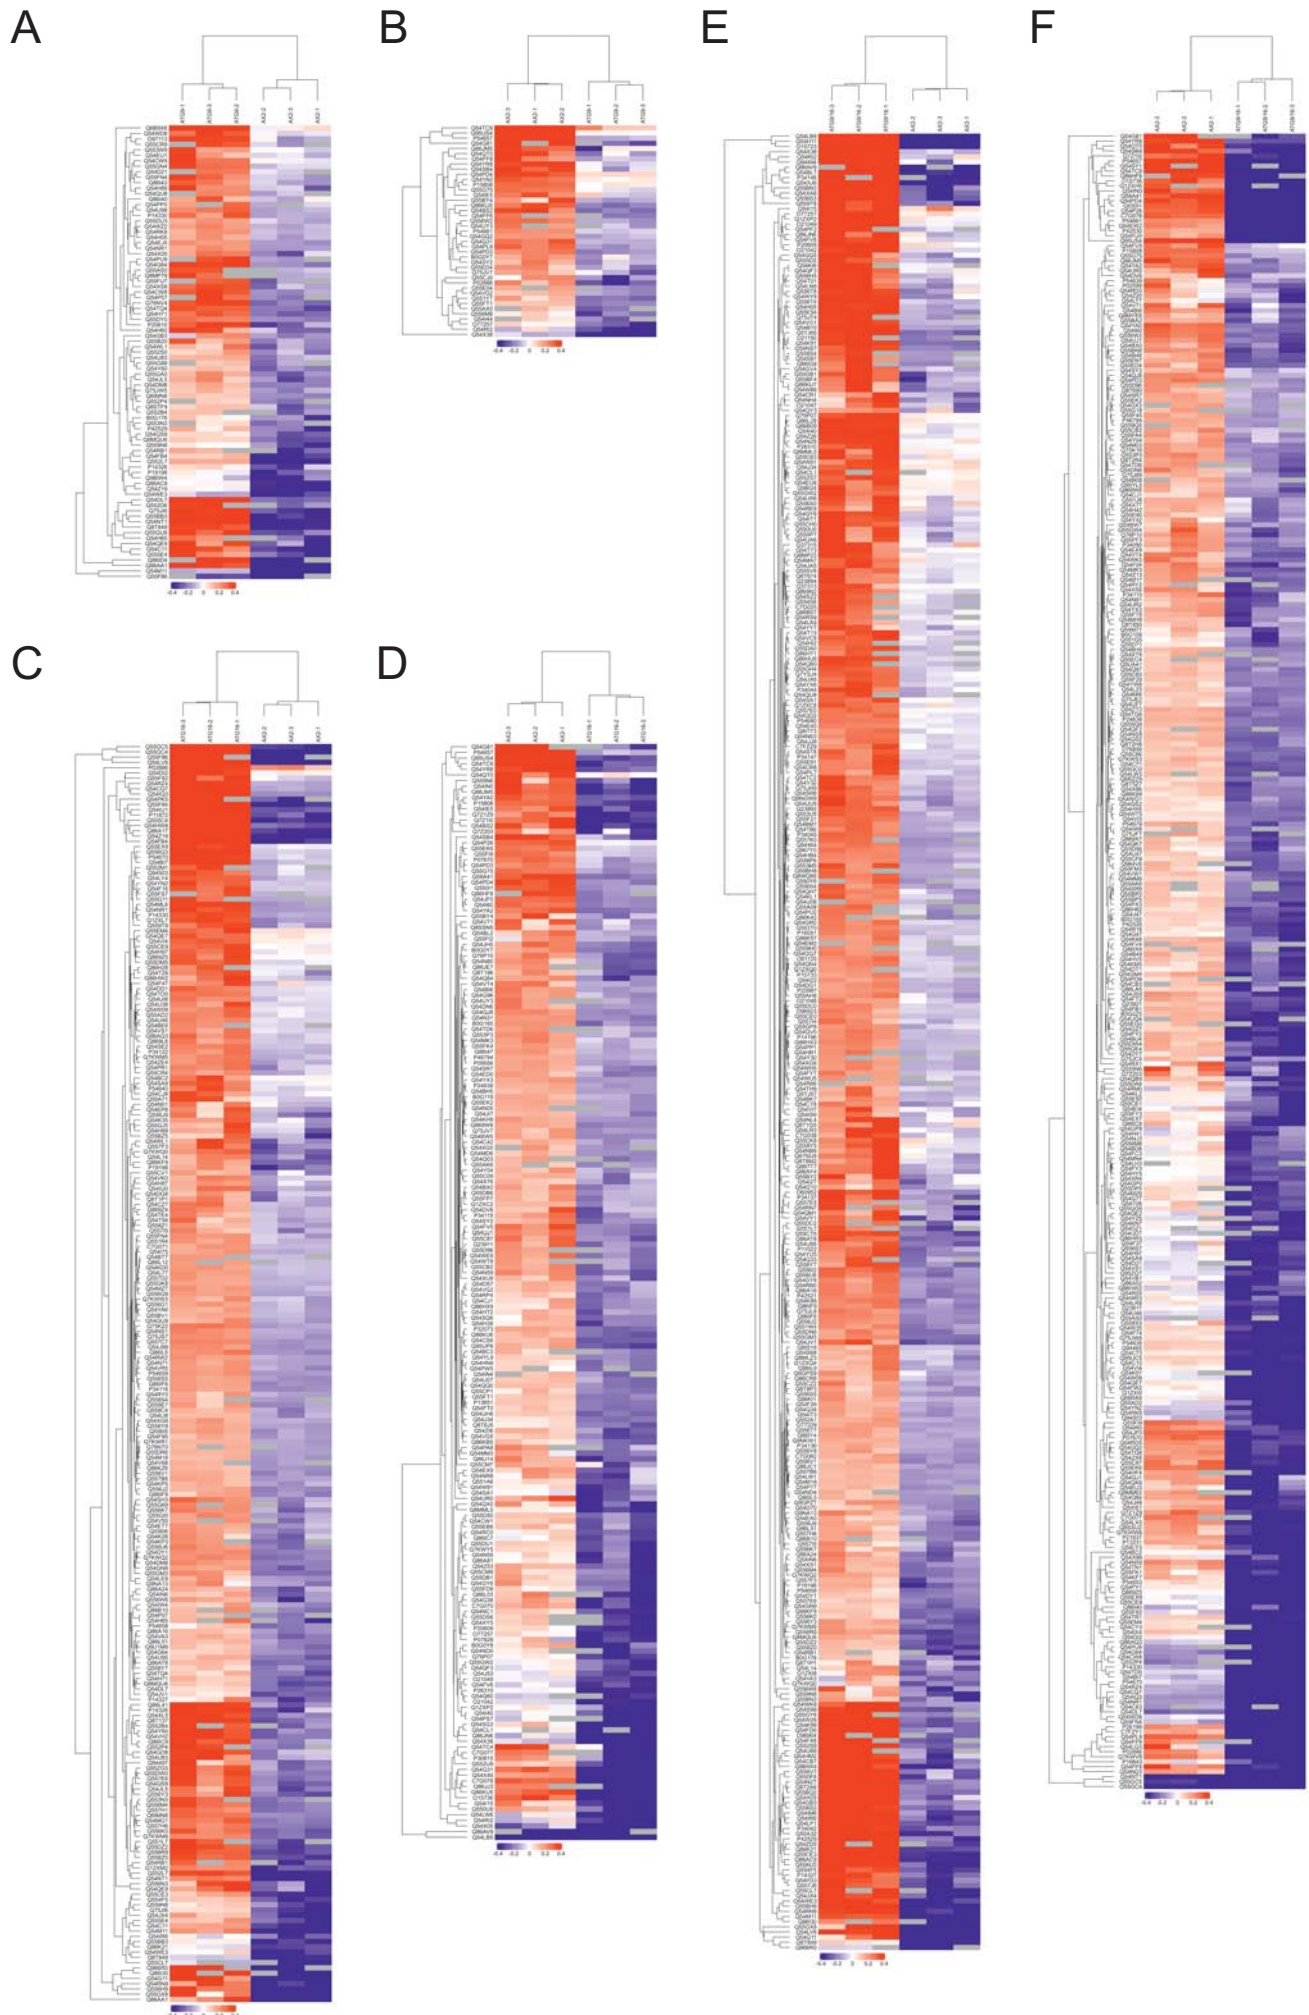

Figure S1: Hierarchical clustering analysis of DEPs of mutant strains versus AX2.

Figure S2

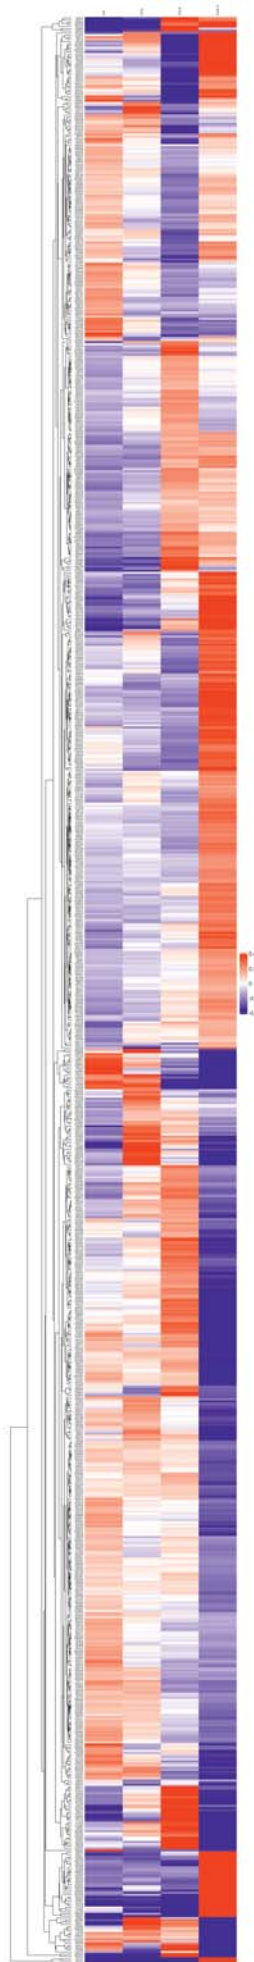

Figure S2: Heat map of DEPs of three mutant strains versus AX2.
